# Supplementary material for: Stabilizing interaction of exopolymers with nano-Se and impact on mercury immobilization in soil and groundwater
Source: Royal Society of Chemistry journal article supplement (doi:10.1039/c7en00628d), 2017-12-12
Supplement: c7en00628d1.pdf [file c7en00628d1.pdf]

## Supplement information

**Nano-Se Producing Bacterium Exopolymers as an Excellent Natural Dispersant of Se**

**Nanoparticles for Mercury Remediation of Soil and Ground Water**

Xiaonan Wang <sup>a, c</sup>, Wenjuan Song<sup>a</sup>, Haifeng Qian <sup>a, b</sup>, Daoyong Zhang<sup>a, b</sup>, Xiangliang Pan <sup>a, b, \*</sup>

<sup>a</sup> *Xinjiang Key Laboratory of Environmental Pollution and Bioremediation, Xinjiang Institute of Ecology and Geography, Chinese Academy of Sciences, Urumqi 830011, China*

<sup>b</sup> *College of Environment, Zhejiang University of Technology, Hangzhou 310014, China*

<sup>c</sup> *University of Chinese Academy of Sciences, Beijing 100049, China*

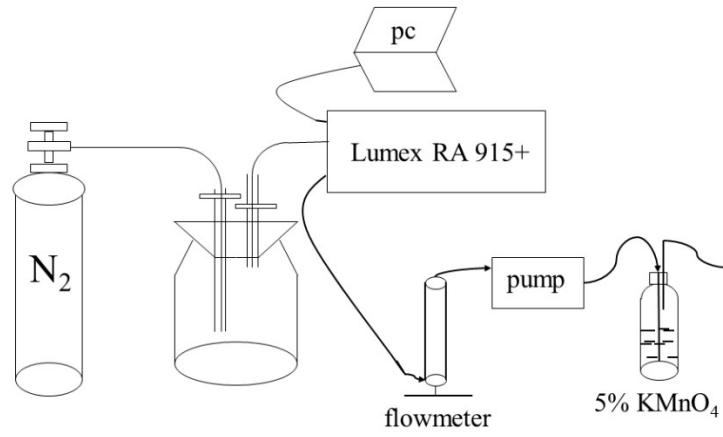

Fig. S1. The experimental setup for remediation of Hg<sup>0</sup> contaminated soil solution or ground water.
